# Supplementary material for: Development of a novel biomimetic micro/nano-hierarchical interface for enhancement of osseointegration
Source: Royal Society of Chemistry journal article supplement (doi:10.1039/c6ra03183h), 2016-01-01
Supplement: c6ra03183h1.pdf [file c6ra03183h1.pdf]

**Supplementary Figure S1:** Comparison of the static contact angles on the titanium samples: (a) untreated-Ti,  $88\pm 5.3^\circ$ ; (b) Micro-Ti,  $81\pm 4.9^\circ$ ; (c) Nano-Ti,  $27\pm 2.6^\circ$ ; and (d) Micro/Nano-Ti,  $21\pm 2.1^\circ$ .

**Supplementary Figure S2:** The alkaline phosphatase (ALP) staining of cells on titanium samples at 14 days: (a) Group A, untreated-Ti; (b) Group b, Micro-Ti; (c) Group C, Nano-Ti; and (d) Group D.

**Supplementary Figure S3:** The expression of integrin  $\beta 1$  was detected by immunofluorescence assay. “Merge” represent the merged images of actin, integrin  $\beta 1$  and nuclei.

**Supplementary Figure S4:** The expression of vinculin was detected by immunofluorescence assay. “Merge” represent the merged images of actin, vinculin and nuclei.

**Supplementary Figure S5:** The expression of OCN and OPN were detected by immunofluorescence assay. “Merge” represent the merged images of OCN, OPN and nuclei.

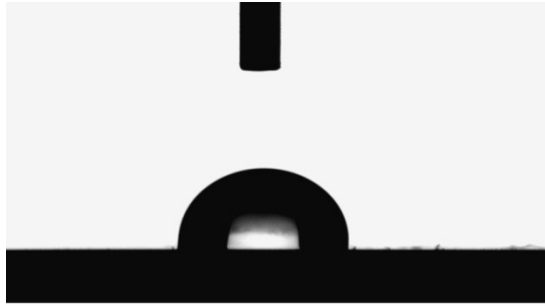

**(a) Untreated-Ti**

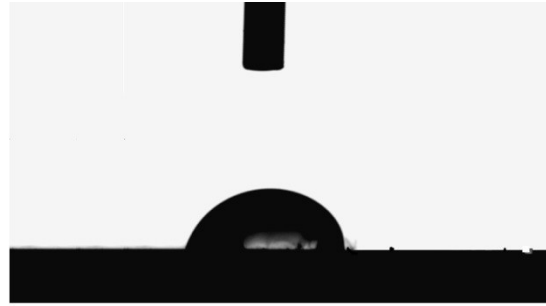

**(b) Micro-Ti**

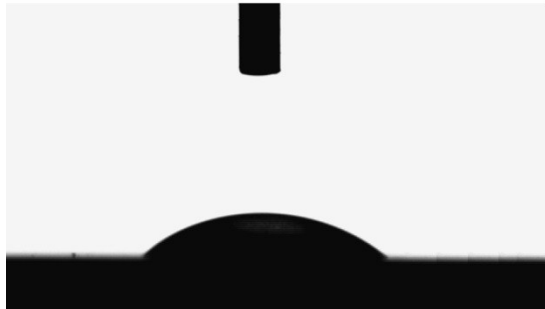

**(c) Nano-Ti**

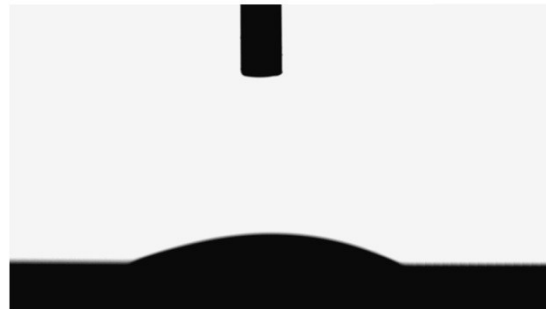

**(d) Micro/Nano-Ti**

Supplementary\_Fig.\_S1

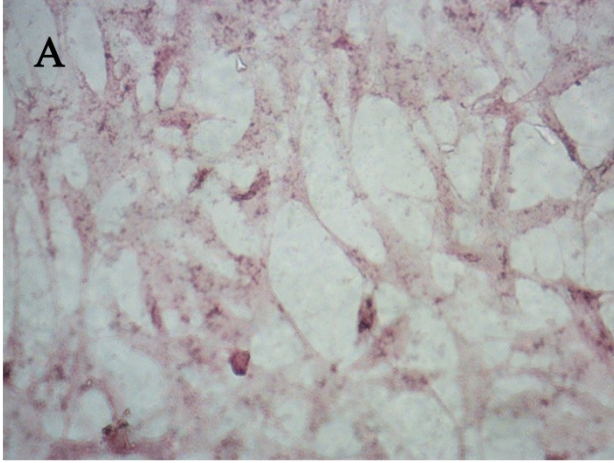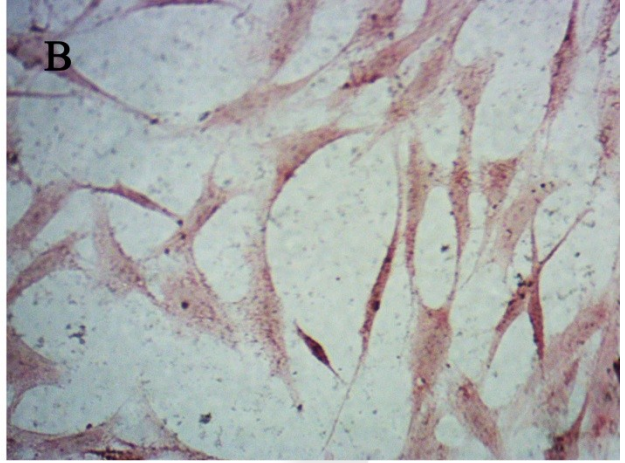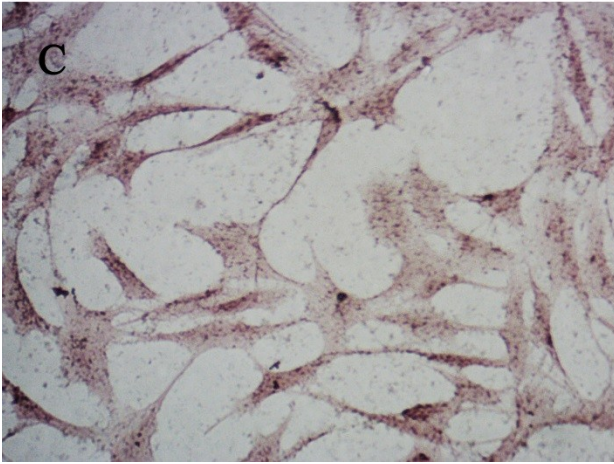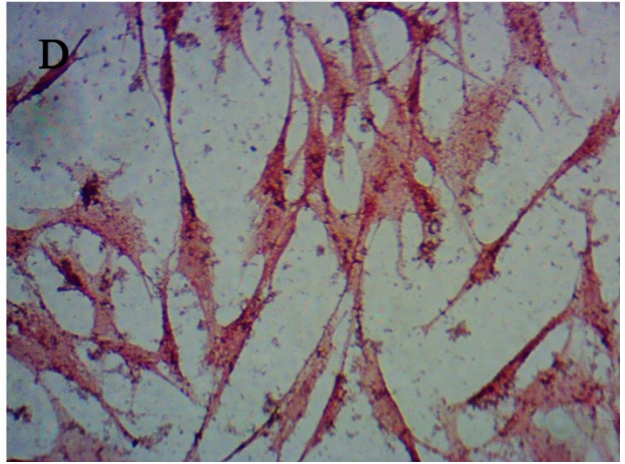

Supplementary\_Fig.\_S2

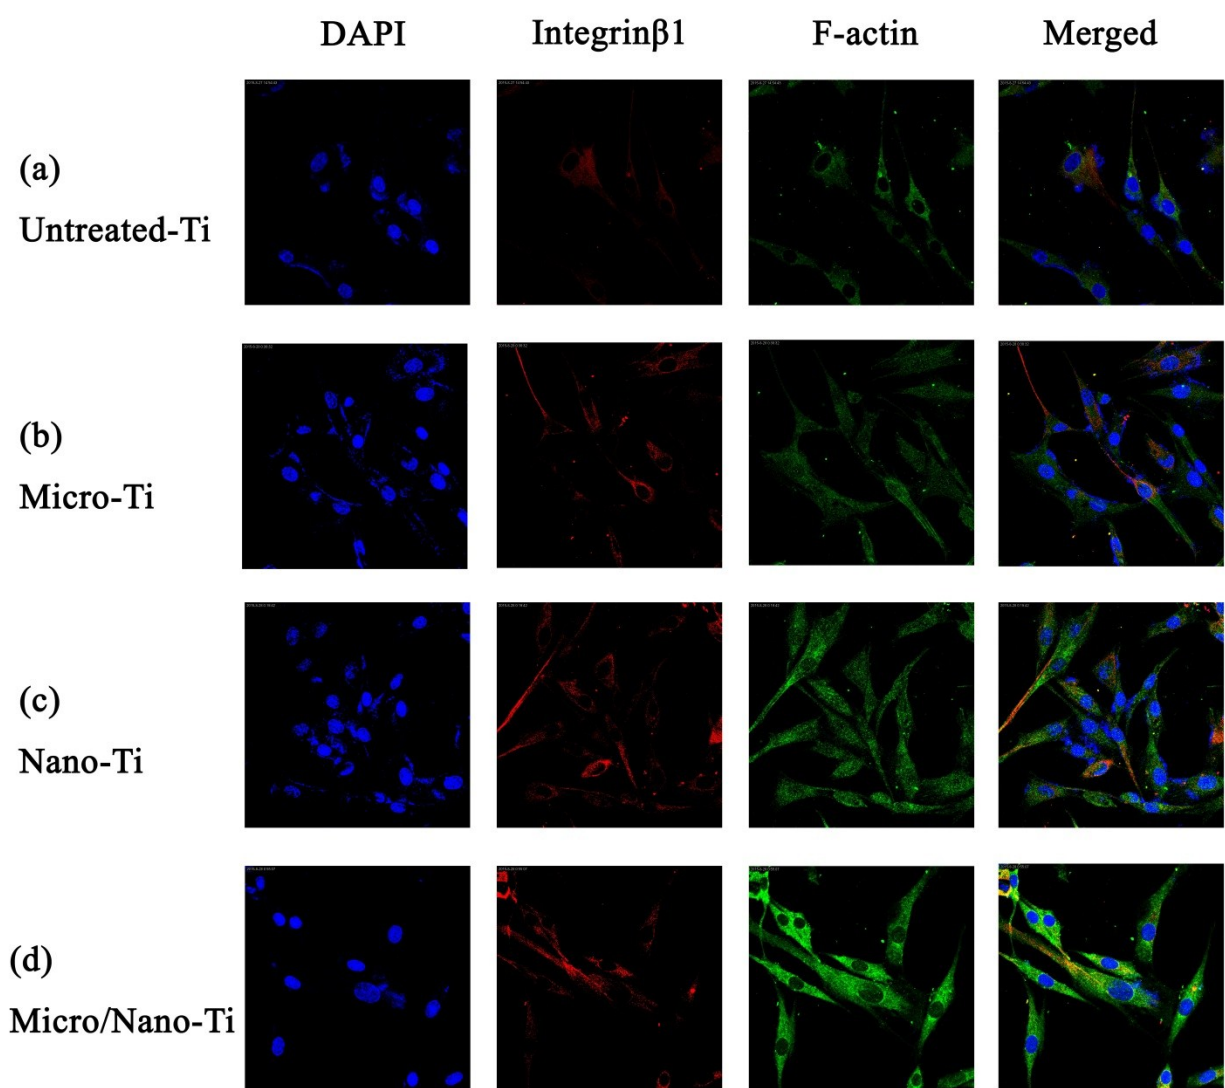

Supplementary\_Fig.\_S3

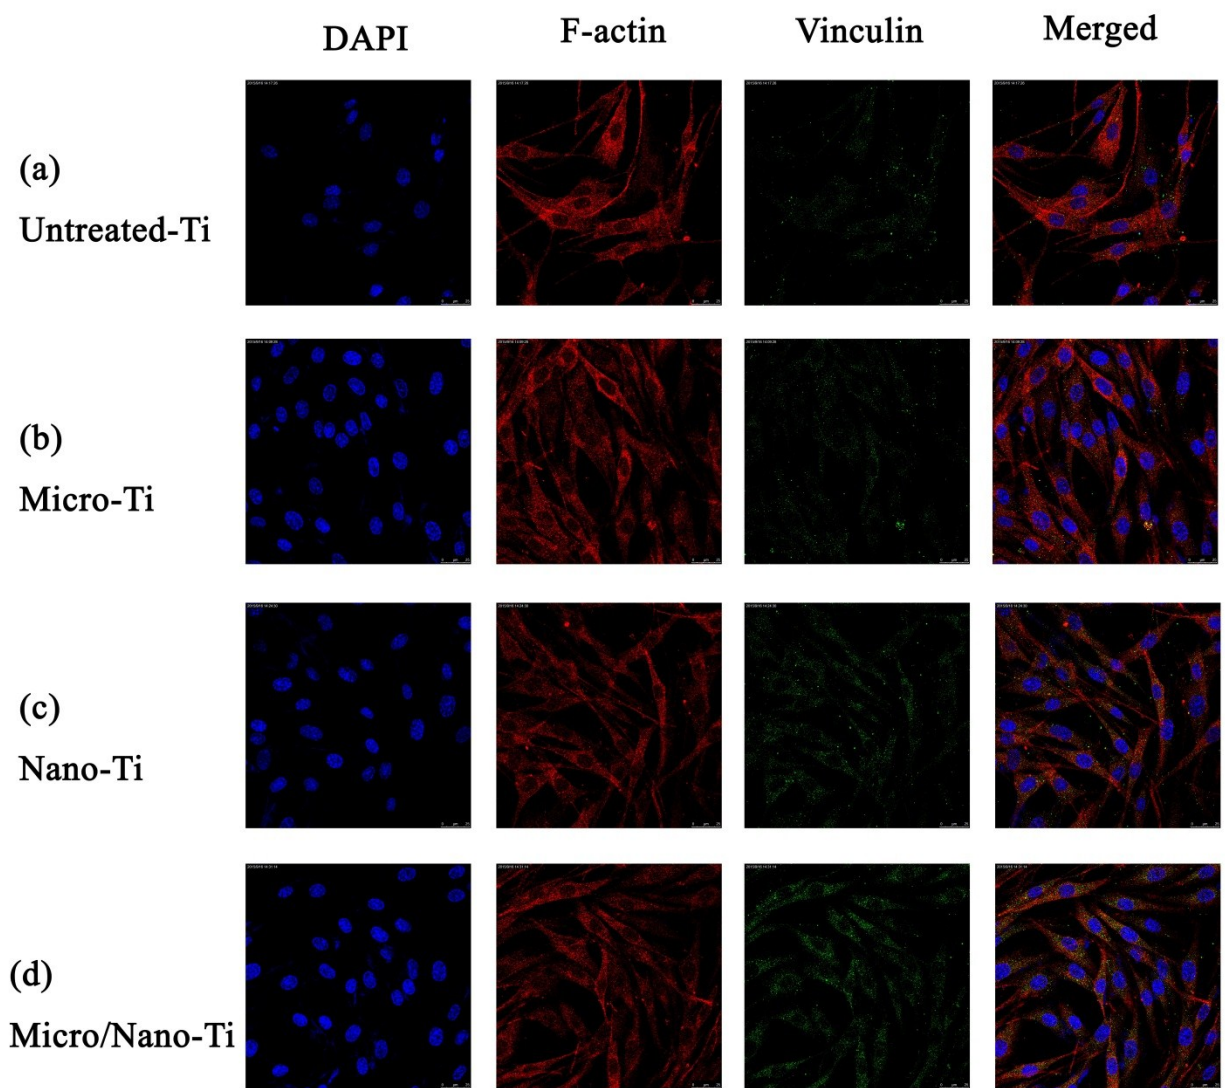

Supplementary\_Fig.\_S4

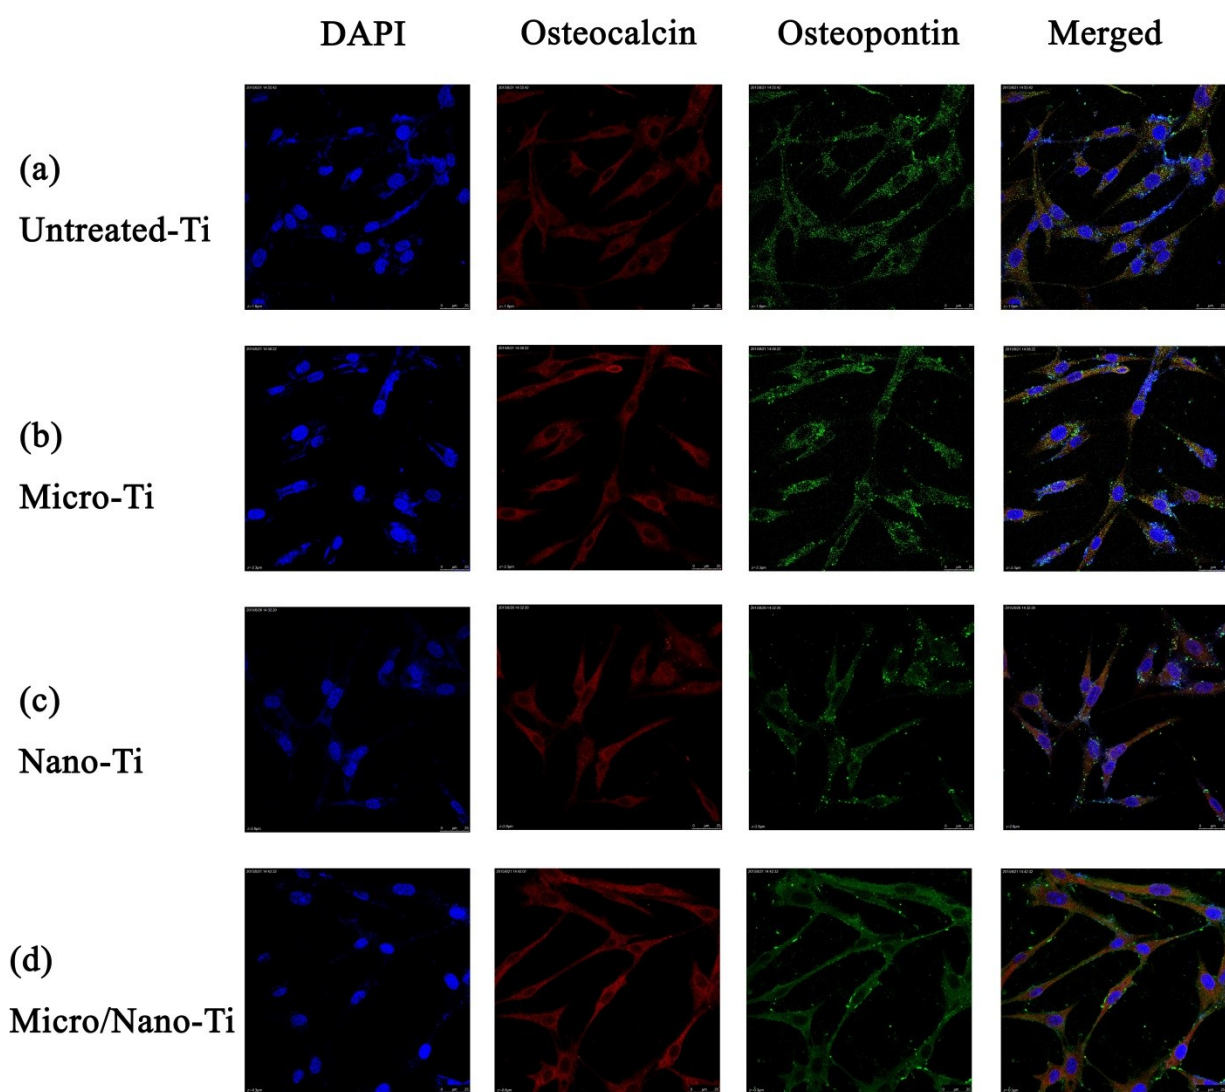

Supplementary\_Fig.\_S5
